# Supplementary material for: Estrogen Replacement Reduces Hearing Threshold Shifts and Cochlear Hair Cell Loss After Acoustic Overexposure in Ovariectomized Rats
Source: PubMed Central journal article supplement — Clin Exp Otorhinolaryngol. 2020 May 15;14(1):61–8. doi: 10.21053/ceo.2019.01662 (PMC7904427; doi:10.21053/ceo.2019.01662), 2020-05-15
Supplement: ceo-2019-01662-suppl.pdf [file ceo-2019-01662-suppl.pdf]

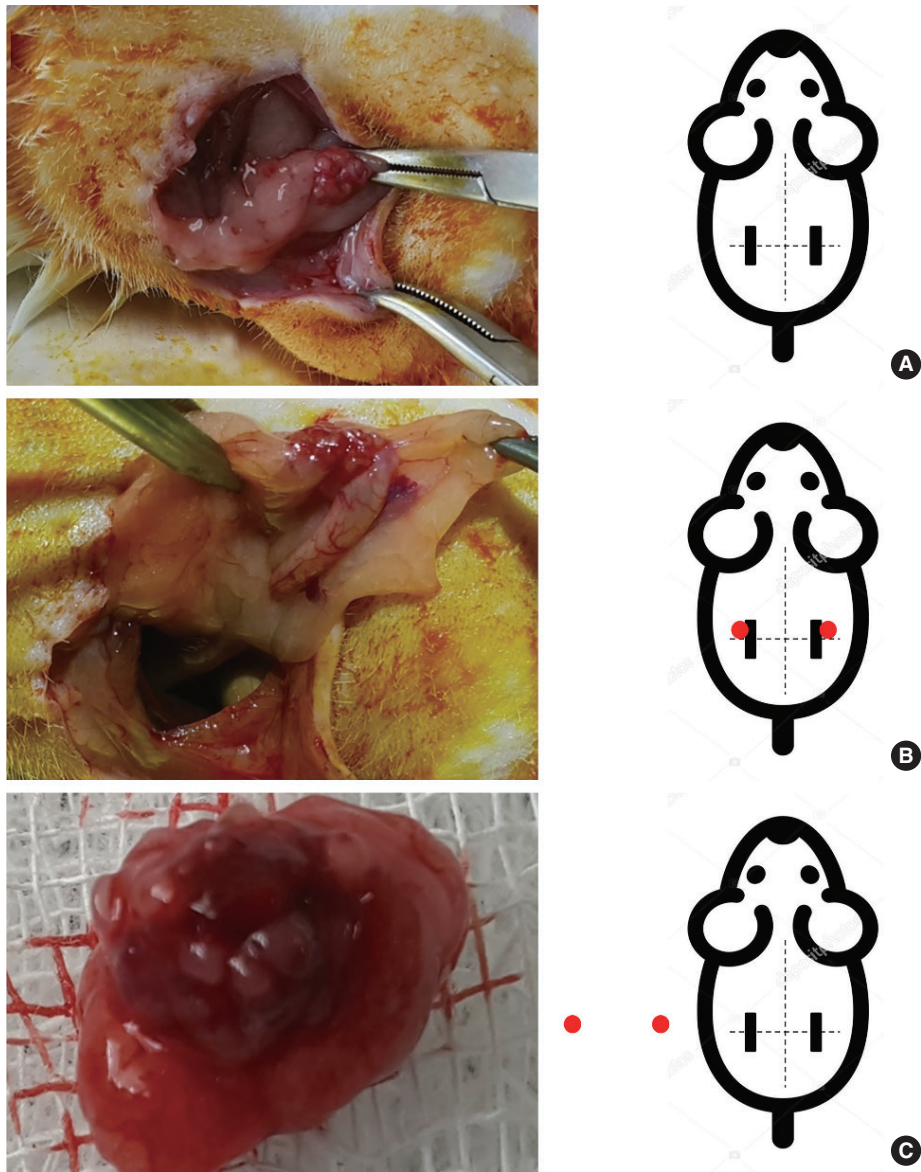

Supplementary Fig. 1. Bilateral ovaries were surgically extracted. Small incisions were made in both dorsolateral sides of each rat. (A) The ovaries were exposed at each side, attached to the ovarian fat pad. (B) The ovaries were removed. (C) Stitching was used to close the incisions. The ovaries are marked with red dots. The surgical procedure is shown schematically on the right.
